# Supplementary material for: Bispecific T-Cell Engagers Targeting Membrane-Bound IgE
Source: MDPI journal article supplement (doi:10.3390/biomedicines9111568), 2021-10-29
Supplement: s1 [file s1]

**Supplementary Table S2.** Oligonucleotide sequences for PCR amplification of BiTE-encoding fragments.

| BiTE construct/Oligonucleotide | Nucleotide sequence (restriction sites underlined) |
|--------------------------------|----------------------------------------------------|
| <b>Blinatumomab</b>            |                                                    |
| Bl_bite_nhe1                   | acgtgctagc gacatccagc tgacac                       |
| Bl_bite_bam2                   | attgggatcc cttcagctcc agcttg                       |
| <b>Omalizumab</b>              |                                                    |
| Oma_bite_nhe1                  | acgtgctagc gacatccagc tgaccag                      |
| Oma_bite_ecorv2                | acgtgatatc gcttccgccg ccaccgctgc tcacggtcac cag    |
| <b>8D6</b>                     |                                                    |
| 8D6_bite_nhe1                  | acgtgctagc gacatcgtgc tgaccag                      |
| 8D6_bite_ecorv2                | acgtgatatc gcttccgccg ccaccggcgc tcacggtcac cag    |
| <b>Ligelizumab</b>             |                                                    |
| Lig_bite_nhe1                  | tgcagctagc gagatcgtga tgaccag                      |
| Oma_bite_ecorv2                | acgtgatatc gcttccgccg ccaccgctgc tcacggtcac cag    |
| <b>MEDI4212</b>                |                                                    |
| Medi_bite_nhe1                 | acgtgctagc cagagcgtgc tgaccag                      |
| Oma_bite_ecorv2                | acgtgatatc gcttccgccg ccaccgctgc tcacggtcac cag    |
| <b>Quilizumab</b>              |                                                    |
| Qui_bite_nhe1                  | acgtgctagc gatattcaga tgactcag                     |
| Qui_bite_ecorv2                | acgtgatatc gcttccgccg ccaccgctgg acactgtcac cag    |
