# Supplementary material for: Bispecific T-Cell Engagers Targeting Membrane-Bound IgE
Source: MDPI journal article supplement (doi:10.3390/biomedicines9111568), 2021-10-29
Supplement: s1 [file s1]

**Supplementary Table S3.** Expression yields of BiTE-like constructs.

| BiTE fragment | Yield after IMAC                   |
|---------------|------------------------------------|
|               | purification per L culture<br>(mg) |
| Blinatumomab  | 47.6                               |
| Omalizumab    | 39.9                               |
| 8D6           | 45.7                               |
| Ligelizumab   | 71.5                               |
| MEDI4212      | 56.8                               |
| Quilizumab    | 17.7                               |
